# Supplementary material for: Music-performance regulates microRNAs in professional musicians
Source: PeerJ. 2019 Mar 29;7:e6660. doi: 10.7717/peerj.6660 (PMC6442922; doi:10.7717/peerj.6660)
Supplement: Supplemental Information 1 [file peerj-07-6660-s001.xlsx]

## Sheet: TAM 2.0
Category	Term	Count	Percent	Fold	P.value	Bonferroni	FDR	miRNA
Function	Aging	5	0.0793651	13.9947	3.68e-06	0.000485	0.00195	hsa-mir-30d,hsa-mir-92a-1,hsa-mir-30a,hsa-mir-222,hsa-mir-92a-2
Function	Chondrocyte Development	3	0.2	35.2667	4.51e-05	0.00595	0.00795	hsa-mir-222,hsa-mir-92a-1,hsa-mir-92a-2
Function	Angiogenesis	4	0.0615385	10.8513	0.000178	0.0235	0.0157	hsa-mir-92a-1,hsa-mir-30a,hsa-mir-222,hsa-mir-92a-2
Function	Regulation of Akt Pathway	3	0.115385	20.3462	0.000251	0.0332	0.0205	hsa-mir-92a-1,hsa-mir-222,hsa-mir-92a-2
Function	Cell Death	4	0.0512821	9.04274	0.000367	0.0485	0.0243	hsa-mir-30d,hsa-mir-92a-1,hsa-mir-222,hsa-mir-92a-2
Function	Bone Regeneration	3	0.1	17.6333	0.000389	0.0514	0.0242	hsa-mir-92a-1,hsa-mir-222,hsa-mir-92a-2
Function	Cholesterol Metabolism	2	0.25	44.0833	0.00074	0.0977	0.0391	hsa-mir-92a-1,hsa-mir-92a-2
Function	Adipocyte Differentiation	3	0.0731707	12.9024	0.000998	0.1317	0.0459	hsa-mir-92a-1,hsa-mir-222,hsa-mir-92a-2
