# Supplementary material for: Music-performance regulates microRNAs in professional musicians
Source: PeerJ. 2019 Mar 29;7:e6660. doi: 10.7717/peerj.6660 (PMC6442922; doi:10.7717/peerj.6660)
Supplement: Supplemental Information 2 [file peerj-07-6660-s002.xlsx]

## Sheet: miEAA
Category	Subcategory	Enrichment	p-value	expected	observed	miRNAs/precursors
Gene Ontology (miRWalk)	GO0033189 response to vitamin a	over-represented	0.00975444	0.166667	4	hsa-miR-92a-3p; hsa-miR-222-3p; hsa-miR-30a-5p; hsa-miR-30d-5p
Gene Ontology (miRWalk)	GO0017085 response to insecticide	over-represented	0.00975444	0.175439	4	hsa-miR-92a-3p; hsa-miR-222-3p; hsa-miR-30a-5p; hsa-miR-30d-5p
Gene Ontology (miRWalk)	GO0050965 detection of temperature stimulus involved in sensory perception of pain	over-represented	0.0125769	0.0614035	3	hsa-miR-92a-3p; hsa-miR-30a-5p; hsa-miR-30d-5p
Gene Ontology (miRWalk)	GO0014012 peripheral nervous system axon regeneration	over-represented	0.0125769	0.0877193	3	hsa-miR-92a-3p; hsa-miR-222-3p; hsa-miR-30d-5p
Gene Ontology (miRWalk)	GO0032387 negative regulation of intracellular transport	over-represented	0.0125769	0.0877193	3	hsa-miR-92a-3p; hsa-miR-222-3p; hsa-miR-30d-5p
Gene Ontology (miRWalk)	GO0001817 regulation of cytokine production	over-represented	0.0125769	0.0964912	3	hsa-miR-92a-3p; hsa-miR-222-3p; hsa-miR-30a-5p
Gene Ontology (miRWalk)	GO0031053 primary mirna processing	over-represented	0.0125769	0.219298	4	hsa-miR-92a-3p; hsa-miR-222-3p; hsa-miR-30a-5p; hsa-miR-30d-5p
Gene Ontology (miRWalk)	GO0060442 branching involved in prostate gland morphogenesis	over-represented	0.0125769	0.254386	4	hsa-miR-92a-3p; hsa-miR-222-3p; hsa-miR-30a-5p; hsa-miR-30d-5p
Gene Ontology (miRWalk)	GO0070245 positive regulation of thymocyte apoptotic process	over-represented	0.0125769	0.263158	4	hsa-miR-92a-3p; hsa-miR-222-3p; hsa-miR-30a-5p; hsa-miR-30d-5p
Gene Ontology (miRWalk)	GO0034101 erythrocyte homeostasis	over-represented	0.0125769	0.289474	4	hsa-miR-92a-3p; hsa-miR-222-3p; hsa-miR-30a-5p; hsa-miR-30d-5p
Gene Ontology (miRWalk)	GO0000028 ribosomal small subunit assembly	over-represented	0.0125769	0.298246	4	hsa-miR-92a-3p; hsa-miR-222-3p; hsa-miR-30a-5p; hsa-miR-30d-5p
Gene Ontology (miRWalk)	GO0000733 dna strand renaturation	over-represented	0.0125769	0.298246	4	hsa-miR-92a-3p; hsa-miR-222-3p; hsa-miR-30a-5p; hsa-miR-30d-5p
Gene Ontology (miRWalk)	GO0048676 axon extension involved in development	over-represented	0.0195424	0.114035	3	hsa-miR-92a-3p; hsa-miR-222-3p; hsa-miR-30d-5p
Gene Ontology (miRWalk)	GO0006108 malate metabolic process	over-represented	0.0195424	0.122807	3	hsa-miR-92a-3p; hsa-miR-222-3p; hsa-miR-30a-5p
Gene Ontology (miRWalk)	GO0009743 response to carbohydrate stimulus	over-represented	0.0195424	0.131579	3	hsa-miR-92a-3p; hsa-miR-222-3p; hsa-miR-30d-5p
Gene Ontology (miRWalk)	GO0002026 regulation of the force of heart contraction	over-represented	0.0195424	0.359649	4	hsa-miR-92a-3p; hsa-miR-222-3p; hsa-miR-30a-5p; hsa-miR-30d-5p
Gene Ontology (miRWalk)	GO0006730 one carbon metabolic process	over-represented	0.0195424	0.368421	4	hsa-miR-92a-3p; hsa-miR-222-3p; hsa-miR-30a-5p; hsa-miR-30d-5p
Gene Ontology (miRWalk)	GO0007183 smad protein complex assembly	over-represented	0.0195424	0.368421	4	hsa-miR-92a-3p; hsa-miR-222-3p; hsa-miR-30a-5p; hsa-miR-30d-5p
Gene Ontology (miRWalk)	GO0030889 negative regulation of b cell proliferation	over-represented	0.0195424	0.385965	4	hsa-miR-92a-3p; hsa-miR-222-3p; hsa-miR-30a-5p; hsa-miR-30d-5p
Gene Ontology (miRWalk)	GO0009651 response to salt stress	over-represented	0.0199398	0.394737	4	hsa-miR-92a-3p; hsa-miR-222-3p; hsa-miR-30a-5p; hsa-miR-30d-5p
Gene Ontology (miRWalk)	GO0032461 positive regulation of protein oligomerization	over-represented	0.0199398	0.394737	4	hsa-miR-92a-3p; hsa-miR-222-3p; hsa-miR-30a-5p; hsa-miR-30d-5p
Gene Ontology (miRWalk)	GO0008625 extrinsic apoptotic signaling pathway via death domain receptors	over-represented	0.0222633	0.412281	4	hsa-miR-92a-3p; hsa-miR-222-3p; hsa-miR-30a-5p; hsa-miR-30d-5p
Gene Ontology (miRWalk)	GO0050775 positive regulation of dendrite morphogenesis	over-represented	0.0231838	0.421053	4	hsa-miR-92a-3p; hsa-miR-222-3p; hsa-miR-30a-5p; hsa-miR-30d-5p
Gene Ontology (miRWalk)	GO0030901 midbrain development	over-represented	0.02392	0.438596	4	hsa-miR-92a-3p; hsa-miR-222-3p; hsa-miR-30a-5p; hsa-miR-30d-5p
